# Supplementary material for: Analysis of Mortality Among Transgender and Gender Diverse Adults in England
Source: PubMed Central journal article supplement (PMC9887492; doi:10.1001/jamanetworkopen.2022.53687), 2023-01-30
Supplement: jamanetwopen-e2253687-s001.pdf [file jamanetwopen-e2253687-s001.pdf]

## Supplemental Online Content

Jackson SS, Brown J, Pfeiffer RM, et al. Analysis of mortality among transgender and gender diverse adults in England. *JAMA Netw Open*. 2023;6(1):e2253687.  
doi:10.1001/jamanetworkopen.2022.53687

### **eAppendix.** Supplemental Methods

**eTable 1.** Read Codes and Terms to Identify Transgender and Gender Diverse Individuals in CPRD GOLD

**eTable 2.** SNOMED Codes and Terms to Identify Transgender and Gender Diverse Individuals in CPRD Aurum

**eTable 3.** Read Codes and Terms to Exclude Individuals With Variations of Sex Characteristics in CPRD GOLD

**eTable 4.** SNOMED Codes and Terms to Exclude Individuals With Variations of Sex Characteristics in CPRD Aurum

**eTable 5.** Medications Extracted From the Medical Record Used to Identify Sex Assigned at Birth Among Transgender and Gender Diverse Participants in CPRD Aurum and GOLD

**eTable 6.** Read Codes and Terms to Identify Sex Assigned at Birth for Transgender and Gender Diverse Individuals in CPRD GOLD

**eTable 7.** SNOMED Codes and Terms to Identify Sex Assigned at Birth for Transgender and Gender Diverse Individuals in CPRD Aurum

**eTable 8.** Sex-Specific Procedures Extracted From the Hospital Episode Statistics Admitted Patient Care and Outpatient Care Files Used to Identify Sex Assigned at Birth Among Transgender and Gender Diverse Individuals

**eTable 9.** Characteristics of Transgender and Gender Diverse Individuals and Cisgender Individuals in the United Kingdom's Clinical Practice Research Datalink 1988–2019 (Without Imputation)

**eTable 10.** Overall and Cause-Specific Mortality Rate Ratios for Transgender and Gender Diverse Individuals Compared to Cisgender Individuals in the United Kingdom's Clinical Practice Research Datalink (Without Imputation)

**eTable 11.** Overall and Cause-Specific Mortality Rate Ratios for Transgender and Gender Diverse Individuals Compared to Cisgender Individuals in the United Kingdom's Clinical Practice Research Datalink (Only Patients Who Could Have Died During or After 1998)

**eTable 12.** Mortality Rate Ratios for Deaths Due to Select Causes of Death Among Transgender and Gender Diverse Individuals Compared to Cisgender Individuals in the United Kingdom's Clinical Practice Research Datalink (Without Imputation)

**eTable 13.** Mortality Rate Ratios for Deaths Due to Select Causes Among Transgender and Gender Diverse Individuals Compared to Cisgender Individuals in the United Kingdom's Clinical Practice Research Datalink (Only Patients Who Could Have Died During or After 1998)

**eFigure.** Flow Chart of Final Analysis Cohort Combining CPRD GOLD and CPRD Aurum

This supplemental material has been provided by the authors to give readers additional information about their work.

## **eAppendix. Supplemental Methods**

A diagnosis of gender incongruence (formerly gender dysphoria, which refers to an individual's profound discomfort with the incongruence between experienced identity and assigned birth sex) is required for individuals to begin gender affirming treatment in most countries, including England. Some transgender and gender diverse (TGD) individuals take hormones or undergo gender affirming surgery (e.g., gender affirming care) to alleviate symptoms of gender incongruence. Some TGD individuals feel that neither the masculine nor feminine gender expression matches their identity (e.g. gender nonbinary persons) and may elect for varying levels of medical and surgical transition.<sup>1</sup> To receive gender affirming care within the National Health Services (NHS) system, adults must be referred by their general practitioner to one of seven gender identity clinics in England. Those <18 years of age must be referred to the Gender Identity Development Service and may be referred on to a gender identity clinic when approaching 18. Diagnoses and treatments received from the gender identity clinics are also transmitted back to the patient's primary care record.

We used diagnostic codes for gender incongruence to identify TGD individuals in CPRD (eTables 1–2). We excluded those with a diagnosis code for differences of sex characteristics (formerly disorders of sex development) (eTables 3–4). These TGD persons were then individually matched to 20 cis men and 20 cis women comprised of patients who have never had a record of gender incongruence or differences of sex characteristics with the following requirements: same year of birth ( $\pm 1$  year), same practice, cisgender control is registered at the time of TGD index date, and TGD person and cisgender control are registered no more than 1 year apart.

Sex assigned at birth for TGD patients was determined by the documentation of gender affirming therapies and surgeries, and sex-specific procedures listed in the primary care database, the linked Hospital Episode Statistics (HES) Admitted Patient Care and Outpatient Care files. The Admitted Patient Care covers the period April 1997 to June 2019 and contains records of all inpatient hospital admissions for patients at NHS hospitals in England. The Outpatient Care covers the period April 2003–June 2019 and contains records from outpatient appointments occurring in England. Medications used for gender affirming hormone therapy are listed in eTable 5 and gender affirming procedures are listed in eTable 6 for Read Terms in CPRD GOLD and eTable 7 for SNOMED terms in CPRD Aurum. Primary diagnoses were coded using the International Statistical Classification of Diseases, Tenth Revision (ICD-10), and procedures were coded using the Classification of Interventions and Procedures from the

Office of Population Census and Surveys codes version 4.4 (eTable 8). Patients with conflicting records were reviewed by a specialist (A.M.B.) who determined assigned sex at birth or recommended exclusion.

These methods enabled us to capture sex assigned at birth from 67% of TGD individuals. For the remaining unclassifiable TGD individuals we used multiple imputation with chained equations to impute missing sex assigned at birth. The results of the non-imputed analysis where sex assigned at birth was not imputed for TGD individuals with missing sex in addition to those with missing values for BMI, smoking status, or alcohol use were excluded are presented in Tables S9–S10. We identified 1330 transfeminine individuals, 892 transmasculine individuals, and 1095 TGD individuals whose sex assigned at birth was unknown matched to 68165 cisgender men and 68004 cisgender women from the CPRD GOLD and Aurum databases between 1988 to 2019.

We used multiple imputation with chained equations, as implemented in PROC MI (SAS 9.4; SAS Institute Inc., Cary, NC) to impute missing values for sex assigned at birth and other variables with missing values (between 5–24% of BMI, smoking status, and alcohol use data were missing). We used age at index date, index year, height, weight, death, race/ethnicity, index of multiple deprivation, BMI, smoking status, and alcohol use to predict the missing values. We created 5 imputed datasets, analyzed them separately, and combined the results using Rubin’s formula for the variance as implemented in PROC MIANALYZE. We used PROC SURVEYFREQ and PROC MIANALYZE to obtain pooled frequencies and proportions.

**eTable 1.** Read Codes and Terms to Identify Transgender and Gender Diverse Individuals in CPRD GOLD

| Read code | Read term                                   |
|-----------|---------------------------------------------|
| 1K4-00    | Gender reassignment patient                 |
| Eu64.00   | [X]Gender identity disorders                |
| E22y400   | Gender role disorder of adolescent or adult |
| Eu64y00   | [X]Other gender identity disorders          |
| Eu64200   | [X]Gender identity disorder of childhood    |
| Eu64z00   | [X]Gender identity disorder, unspecified    |
| Eu64000   | [X]Transsexualism                           |
| 1K-.00    | Gender <sup>a</sup>                         |

<sup>a</sup>Individuals with only this Read term in the medical record were required to additionally have evidence of gender affirming care (gender affirming hormone therapy or gender affirming surgery) to be included in the TGD group.

**eTable 2.** SNOMED Codes and Terms to Identify Transgender and Gender Diverse Individuals in CPRD Aurum

| SNOMED description ID | Term                                                                           |
|-----------------------|--------------------------------------------------------------------------------|
| 41693015              | Operation for sexual transformation NOS                                        |
| 41693015              | Other specified operation for sexual transformation                            |
| 145857010             | [X]Other gender identity disorders                                             |
| 370377016             | Desire to become member of the opposite sex                                    |
| 2158979015            | [X]Transsexualism                                                              |
| 2158979015            | Transsexual                                                                    |
| 2158979015            | Trans-sexualism                                                                |
| 2158979015            | Trans-sexualism NOS                                                            |
| 2158979015            | Trans-sexuality with unspecified sexual history                                |
| 2158981018            | Male-to-female transsexual                                                     |
| 2158982013            | Female-to-male transsexual                                                     |
| 2158983015            | Surgically transgendered transsexual, male-to-female                           |
| 2158984014            | Surgically transgendered transsexual, female-to-male                           |
| 2952273010            | Trans-sexuality with heterosexual history                                      |
| 2952280012            | Trans-sexuality with homosexual history                                        |
| 2952296010            | Trans-sexuality with asexual history                                           |
| 2955531013            | [X]Dual-role transvestism                                                      |
| 2955541011            | [X]Fetishistic transvestism                                                    |
| 3298519013            | Male to female transsexual person on hormone therapy                           |
| 3298557013            | Female to male transsexual person on hormone therapy                           |
| 3317388016            | Operations for sexual transformation                                           |
| 2003021000006114      | Seen in gender identity clinic                                                 |
| 2227021000000113      | Referral to LGBT (lesbian, gay, bisexual and transgender) service <sup>a</sup> |
| 2679981000000118      | Non-binary gender                                                              |

<sup>a</sup>Individuals with only this term in the medical record were required to additionally have evidence of gender affirming care (gender affirming hormone therapy or gender affirming surgery) to be included in the transgender cohort.

**eTable 3.** Read Codes and Terms to Exclude Individuals With Variations of Sex Characteristics in CPRD GOLD

| Read code | Read term                                                  |
|-----------|------------------------------------------------------------|
| PC7z.00   | Indeterminate sex or pseudohermaphroditism NOS             |
| PC7z000   | Indeterminate sex NOS                                      |
| PC7-00    | Indeterminate sex and pseudohermaphroditism                |
| C152814   | Pseudohermaphrodite, male with adrenocortical disorder     |
| PC71.00   | Male pseudohermaphroditism                                 |
| PC70      | True hermaphroditism                                       |
| PC72.00   | Female pseudohermaphroditism                               |
| PC7z111   | False hermaphrodite                                        |
| PJyy100   | 46XX true hermaphrodite                                    |
| K01w112   | Wilms' tumour + nephrotic syndrome + pseudohermaphroditism |

**eTable 4.** SNOMED Codes and Terms to Exclude Individuals With Variations of Sex Characteristics in CPRD Aurum

| SNOMED description ID | Term                                                        |
|-----------------------|-------------------------------------------------------------|
| 15516019              | Female pseudohermaphroditism                                |
| 178565013             | Male pseudohermaphroditism                                  |
| 315484010             | Chimera 46XX/46XY, true hermaphrodite                       |
| 315485011             | 46XX true hermaphrodite                                     |
| 354341016             | Nephrotic syndrome with pseudohermaphroditism               |
| 354342011             | Wilms' tumour + nephrotic syndrome + pseudohermaphroditism  |
| 356304015             | Pseudohermaphrodite, male with adrenocortical disorder      |
| 356309013             | Pseudohermaphrodite, female with adrenocortical disorder    |
| 377946011             | False hermaphrodite                                         |
| 400865010             | Indeterminate sex and pseudohermaphroditism                 |
| 400865010             | Indeterminate sex NOS                                       |
| 400865010             | Indeterminate sex or pseudohermaphroditism NOS              |
| 400865010             | Pseudohermaphrodite NOS                                     |
| 478925016             | True hermaphroditism                                        |
| 3047788013            | Intersex NEC                                                |
| 2301891000000112      | Operations for disorders of sex development                 |
| 2301891000000112      | Other specified operations for disorders of sex development |
| 2301891000000112      | Unspecified operations for disorders of sex development     |

**eTable 5.** Medications Extracted From the Medical Record Used to Identify Sex Assigned at Birth Among Transgender and Gender Diverse Participants in CPRD Aurum and GOLD

| Product name                | Indication          | Assigned sex at birth |
|-----------------------------|---------------------|-----------------------|
| Andropatch                  | Androgen            | Female                |
| Intrinsa                    |                     |                       |
| Mesterolone                 |                     |                       |
| Nebido                      |                     |                       |
| Primoteston                 |                     |                       |
| Proscar                     |                     |                       |
| Restandol                   |                     |                       |
| Sustanon                    |                     |                       |
| Testim                      |                     |                       |
| Testogel                    |                     |                       |
| Testosterone                |                     |                       |
| Tostran                     |                     |                       |
| Viormone                    |                     |                       |
| 5-alpha reductase inhibitor | Anti-Androgen       | Male                  |
| Androcur                    |                     |                       |
| Bicalutamide                |                     |                       |
| Cyprostat                   |                     |                       |
| Cyproterone                 |                     |                       |
| Dutasteride                 |                     |                       |
| Finasteride                 |                     |                       |
| Flutamide                   |                     |                       |
| Spironolactone              |                     |                       |
| Letrozole                   | Aromatase inhibitor | Female                |
| Tamoxifen                   | Estrogen            | Male                  |
| Climaval                    |                     |                       |
| Conjugated oestrogens       |                     |                       |
| Elleste                     |                     |                       |
| Estraderm                   |                     |                       |
| Estradiol                   |                     |                       |
| Estradot                    |                     |                       |
| Ethinylestradiol            |                     |                       |
| Evorel                      |                     |                       |
| Femoston                    |                     |                       |
| Femseven                    |                     |                       |
| Hormonin                    |                     |                       |
| Oestrogel                   |                     |                       |
| Ortho diennoestrol          |                     |                       |
| Premarin                    |                     |                       |
| Prempak                     |                     |                       |
| Progynova                   |                     |                       |
| Sandrena                    |                     |                       |
| Trisequins                  |                     |                       |
| Zumenon                     |                     |                       |
| Crinone                     |                     |                       |
| Depo-provera                |                     |                       |
| Etonogestrel                |                     |                       |
| Implanon                    |                     |                       |
| Nexplanon                   |                     |                       |
| Norethisterone              |                     |                       |
| Provera                     |                     |                       |
| Utoflan                     |                     |                       |

|                     |              |      |
|---------------------|--------------|------|
| Medroxyprogesterone | Progestogens | Male |
| Provera             |              |      |

**eTable 6.** Read Codes and Terms to Identify Sex Assigned at Birth for Transgender and Gender Diverse Individuals in CPRD GOLD

| Read code | Read Term                                                    | Assigned sex at birth |
|-----------|--------------------------------------------------------------|-----------------------|
| ZV6G100   | [V]Acquired absence of breast(s)                             | Female                |
| ZV50111   | [V]Breast augmentation                                       | Female                |
| 7E04511   | Abdominal hysterectomy & bilateral salpingoophorectomy (BSO) | Female                |
| 7E04500   | Abdominal hysterectomy and bilateral salpingoophorectomy     | Female                |
| 7E04800   | Abdominal hysterectomy and left salpingoophorectomy          | Female                |
| 7130800   | Bilateral mastectomy                                         | Female                |
| 7E10200   | Bilateral oophorectomy NEC                                   | Female                |
| 7E10000   | Bilateral salpingoophorectomy                                | Female                |
| G860.11   | Elephantiasis-postmastectomy                                 | Female                |
| 159B.00   | H/O: bilateral oophorectomy                                  | Female                |
| 7130511   | Halsted radical mastectomy                                   | Female                |
| 7E05600   | Lap assist vag hysterectomy with bilat salpingo-oophorectomy | Female                |
| 7E04B00   | Lapar total abdominal hysterect bilat salpingo-oophorectomy  | Female                |
| 6753      | Mastectomy counselling                                       | Female                |
| 7130900   | Modified radical mastectomy                                  | Female                |
| 7E12200   | Oophorectomy NEC                                             | Female                |
| 7131.11   | Other mastectomy operations                                  | Female                |
| 7130y00   | Other specified total mastectomy                             | Female                |
| 7131100   | Partial mastectomy NEC                                       | Female                |
| G860      | Postmastectomy lymphoedema                                   | Female                |
| 7130512   | Radical mastectomy                                           | Female                |
| 7130500   | Radical mastectomy including axillary lymph nodes            | Female                |
| 7130600   | Simple mastectomy                                            | Female                |
| 7130A00   | Skin-sparing mastectomy                                      | Female                |
| 7130400   | Subcutaneous mastectomy                                      | Female                |
| 7130700   | Subcutaneous mastectomy for gynaecomastia                    | Female                |
| 7E04512   | TAH - total abdom hysterectomy & bilateral salpingoophorect  | Female                |
| 7130000   | Total mastectomy & excision pectoral muscs & part chest wall | Female                |
| 7130100   | Total mastectomy and excision of both pectoral muscles NEC   | Female                |
| 7130200   | Total mastectomy and excision of pectoralis minor muscle     | Female                |
| 7130300   | Total mastectomy NEC                                         | Female                |
| 7130z00   | Total mastectomy NOS                                         | Female                |
| 7130      | Total mastectomy operations                                  | Female                |

**eTable 7.** SNOMED Codes and Terms to Identify Sex Assigned at Birth for Transgender and Gender Diverse Individuals in CPRD Aurum

| SNOMED description ID | Term                                                         | Assigned sex at birth |
|-----------------------|--------------------------------------------------------------|-----------------------|
| 371333019             | [V]Acquired absence of breast(s)                             | Female                |
| 184451014             | Abdominal hysterectomy                                       | Female                |
| 184453012             | Abdominal hysterectomy & bilateral salpingoophorectomy (BSO) | Female                |
| 2900473014            | Abdominal hysterectomy & excision of periuterine tissue NEC  | Female                |
| 184453012             | Abdominal hysterectomy and bilateral salpingoophorectomy     | Female                |
| 443763014             | Abdominal hysterectomy and left salpingoophorectomy          | Female                |



|                  |                                                                  |        |
|------------------|------------------------------------------------------------------|--------|
| 443763014        | Abdominal hysterectomy and left salpingoophorectomy              | Female |
| 443762016        | Abdominal hysterectomy and right salpingoophorectomy             | Female |
| 2474692011       | Abdominal hysterectomy with conservation of ovaries              | Female |
| 870341000006119  | Bilat. salpingo-oophorectomy                                     | Female |
| 273170011        | Bilateral microvascular orchidopexy                              | Female |
| 127631019        | Bilateral oophorectomy NEC                                       | Female |
| 49911018         | Bilateral salpingoophorectomy                                    | Female |
| 451138019        | Bonney abdominal hysterectomy                                    | Female |
| 474933010        | Extended radical mastectomy                                      | Female |
| 858661000006111  | Extended simple mastectomy                                       | Female |
| 1485111017       | H/O: bilateral oophorectomy                                      | Female |
| 252126010        | H/O: hysterectomy                                                | Female |
| 474903015        | Halsted radical mastectomy                                       | Female |
| 393622010        | Heaney vaginal hysterectomy                                      | Female |
| 2817411010       | Lap assist vag hysterectomy with bilat salpingo-oophorectomy     | Female |
| 2534190016       | Lapar total abdominal hysterect bilat salpingo-oophorectomy      | Female |
| 1485111017       | H/O: bilateral oophorectomy                                      | Female |
| 252126010        | H/O: hysterectomy                                                | Female |
| 474903015        | Halsted radical mastectomy                                       | Female |
| 393622010        | Heaney vaginal hysterectomy                                      | Female |
| 2817411010       | Lap assist vag hysterectomy with bilat salpingo-oophorectomy     | Female |
| 2534190016       | Lapar total abdominal hysterect bilat salpingo-oophorectomy      | Female |
| 355049018        | Laparoscopic hysterectomy                                        | Female |
| 2773128015       | Laparoscopic subtotal hysterectomy                               | Female |
| 1233920014       | Laparoscopic vaginal hysterectomy                                | Female |
| 1485111017       | H/O: bilateral oophorectomy                                      | Female |
| 252126010        | H/O: hysterectomy                                                | Female |
| 474903015        | Halsted radical mastectomy                                       | Female |
| 393622010        | Heaney vaginal hysterectomy                                      | Female |
| 1573171000006118 | Laparoscopic-assist vaginal hysterec bilat salpingo-oophorectomy | Female |
| 444030018        | Left oophorectomy NEC                                            | Female |
| 273903010        | Left salpingoophorectomy                                         | Female |
| 2158157014       | Modified radical mastectomy                                      | Female |
| 2767711012       | Other mastectomy operations                                      | Female |
| 266409013        | Other specified total mastectomy                                 | Female |
| 106993015        | Partial mastectomy NEC                                           | Female |
| 451138019        | Radical abdominal hysterectomy                                   | Female |
| 184456016        | Radical hysterectomy                                             | Female |
| 1894251000006114 | Radical hysterectomy with bilateral salpingo-oophorectomy        | Female |
| 2358601000000119 | Radical hysterectomy with conservation of ovaries                | Female |
| 1479045012       | Radical mastectomy                                               | Female |
| 410874017        | Radical mastectomy including axillary lymph nodes                | Female |
| 197188014        | Radical vaginal hysterectomy                                     | Female |
| 444029011        | Right oophorectomy NEC                                           | Female |
| 273900013        | Right salpingoophorectomy                                        | Female |
| 871011000006111  | Salango - oophorotomy                                            | Female |
| 184484014        | Salpingoophorectomy NEC                                          | Female |
| 184484014        | Salpingoophorectomy remaining solitary fallop tube and ovary     | Female |
| 486325012        | Schauta radical vaginal hysterectomy                             | Female |
| 266409013        | Simple mastectomy                                                | Female |
| 2694270019       | Skin-sparing mastectomy                                          | Female |
| 116564019        | Subcutaneous mastectomy                                          | Female |
| 870101000006119  | Subtotal abdom. hysterectomy                                     | Female |

|                  |                                                                  |        |
|------------------|------------------------------------------------------------------|--------|
| 273717011        | Subtotal abdominal hysterectomy                                  | Female |
| 2358481000000110 | Subtotal abdominal hysterectomy & left salpingo-oophorectomy     | Female |
| 1894281000006118 | Subtotal abdominal hysterectomy and left salpingo-oophorectomy   | Female |
| 1894271000006116 | Subtotal abdominal hysterectomy and right salpingo-oophorectomy  | Female |
| 1894241000006112 | Subtotal abdominal hysterectomy with bilat salpingo-oophorectomy | Female |
| 273717011        | Subtotal abdominal hysterectomy with conservation of ovaries     | Female |
| 2358381000000117 | Subtotl abdominal hysterectomy & bilat salpingo-oophorectomy     | Female |
| 2358441000000119 | Subtotl abdominal hysterectomy & right salpingo-oophorectomy     | Female |
| 184453012        | TAH - Tot abdom hysterectomy and BSO - bilat salpingophorect     | Female |
| 1220269014       | TAH - total abdom hysterectomy & bilateral salpingoophorect      | Female |
| 184452019        | Total abdominal hysterectomy NEC                                 | Female |
| 628771000000110  | Total abdominal hysterectomy with conservation of ovaries        | Female |
| 853791000006118  | Total hysterectomy                                               | Female |
| 851411000006118  | Total hysterectomy & BSO                                         | Female |
| 474933010        | Total mastectomy & excision pectoral muscs & part chest wall     | Female |
| 355751013        | Total mastectomy and excision of both pectoral muscles NEC       | Female |
| 1489357016       | Total mastectomy and excision of pectoralis minor muscle         | Female |
| 1221494019       | Total mastectomy NEC                                             | Female |
| 1221494019       | Total mastectomy NOS                                             | Female |
| 1221494019       | Total mastectomy operations                                      | Female |
| 870391000006111  | Unilat.salpingo-oophorectomy                                     | Female |
| 55338015         | Unilateral oophorectomy NEC                                      | Female |
| 184484014        | Unilateral salpingoophorectomy NEC                               | Female |
| 393622010        | Vaginal hysterectomy                                             | Female |
| 2899369019       | Vaginal hysterectomy and excision of periuterine tissue NEC      | Female |
| 1894971000006114 | Vaginal hysterectomy and left salpingo-oophorectomy              | Female |
| 2358521000000110 | Vaginal hysterectomy and right salpingo-oophorectomy             | Female |
| 393622010        | Vaginal hysterectomy NEC                                         | Female |
| 2474693018       | Vaginal hysterectomy with conservation of ovaries                | Female |
| 393622010        | Ward vaginal hysterectomy                                        | Female |
| 451139010        | Wertheim hysterectomy                                            | Female |
| 134108016        | Amputation of penis                                              | Male   |
| 134108016        | Amputation of penis NOS                                          | Male   |
| 273169010        | Bevan bilateral orchidopexy                                      | Male   |
| 273144010        | Bilateral inguinal orchidectomy                                  | Male   |
| 46639019         | Bilateral mastectomy                                             | Male   |
| 1480776010       | Bilateral orchidectomy                                           | Male   |
| 1480776010       | Bilateral orchidectomy NOS                                       | Male   |
| 273169010        | Bilateral orchidopexy                                            | Male   |
| 273169010        | Bilateral orchidopexy NOS                                        | Male   |
| 273147015        | Bilateral scrotal orchidectomy                                   | Male   |
| 273141019        | Bilateral subcapsular orchidectomy                               | Male   |
| 273145011        | Bilateral total inguinal orchidectomy                            | Male   |
| 273143016        | Bilateral total orchidectomy, unspecified method                 | Male   |
| 273146012        | Bilateral total scrotal orchidectomy                             | Male   |
| 273175018        | First stage bilateral orchidopexy                                | Male   |
| 443236014        | First stage unilateral orchidopexy                               | Male   |

|                 |                                             |      |
|-----------------|---------------------------------------------|------|
| 251866010       | H/O: orchidectomy                           | Male |
| 868781000006115 | Incision of testis-orchidotomy              | Male |
| 273169010       | Ombredanne bilateral orchidopexy            | Male |
| 1481753016      | Ombredanne unilateral orchidopexy           | Male |
| 1481753016      | One stage unilateral orchidopexy            | Male |
| 1481753016      | Other one stage bilateral orchidopexy       | Male |
| 134108016       | Other specified amputation of penis         | Male |
| 1480776010      | Other specified bilateral orchidectomy      | Male |
| 3512849014      | Other specified unilateral orchidopexy      | Male |
| 273176017       | Second stage bilateral orchidopexy          | Male |
| 443241018       | Second stage unilateral orchidopexy         | Male |
| 868641000006115 | Testis excision/orchidectomy                | Male |
| 273304010       | Total amputation of penis                   | Male |
| 2883990010      | Unilateral inguinal orchidectomy            | Male |
| 141585012       | Unilateral microvascular orchidopexy        | Male |
| 868661000006116 | Unilateral orchidectomy                     | Male |
| 354273013       | Unilateral scrotal orchidectomy             | Male |
| 354273013       | Unilateral subcapsular orchidectomy         | Male |
| 354273013       | Unilateral total orchidectomy - unspecified | Male |

**eTable 8.** Sex-Specific Procedures Extracted From the Hospital Episode Statistics Admitted Patient Care and Outpatient Care Files Used to Identify Sex Assigned at Birth Among Transgender and Gender Diverse Individuals

| OPCS Code                                              | Procedure                                                                                                                                                                                                                                                                                                                                                                                         | General Classification                | Sex Assigned At Birth |
|--------------------------------------------------------|---------------------------------------------------------------------------------------------------------------------------------------------------------------------------------------------------------------------------------------------------------------------------------------------------------------------------------------------------------------------------------------------------|---------------------------------------|-----------------------|
| B27.x                                                  | Total excision of breast, total mastectomy and excision of both pectoral muscles and part of chest wall, total mastectomy and excision of both pectoral muscles NEC, total mastectomy and excision of pectoralis minor muscle, total mastectomy NEC, subcutaneous mastectomy, skin sparing mastectomy, mastectomy, other specified total excision of breast, unspecified total excision of breast | Mastectomy                            | Female                |
| B31.1                                                  | Reduction mammoplasty                                                                                                                                                                                                                                                                                                                                                                             | Other plastic operations on breast    | Female                |
| Q01.1, Q01.2, Q01.3, Q01.4, Q01.8, Q01.9               | Amputation of cervix uteri, wedge excision of cervix uteri and suture HFQ, excision of lesion of cervix uteri, large loop excision of transformation zone, other specified excision of cervix uteri, unspecified excision of cervix uteri                                                                                                                                                         | Excision of cervix uteri              | Female                |
| Q02.1, Q02.2, Q02.3, Q02.4, Q02.8, Q02.9               | Avulsion of lesion of cervix uteri, laser destruction of lesion of cervix uteri, cauterisation of lesion of cervix uteri, cryotherapy to lesion of cervix uteri, other specified destruction of lesion of cervix uteri, unspecified destruction of lesion of cervix uteri                                                                                                                         | Destruction of lesion of cervix uteri | Female                |
| Q03.1, Q03.2, Q03.3, Q03.4, Q03.5, Q03.8, Q03.9        | Knife cone biopsy of cervix uteri, laser cone biopsy of cervix uteri, cone biopsy of cervix uteri NEC, punch biopsy of cervix uteri, ring biopsy of cervix uteri, other specified biopsy of cervix uteri, unspecified biopsy of cervix uteri                                                                                                                                                      | Biopsy of cervix uteri                | Female                |
| Q05.1, Q05.2., Q05.8, Q05.9                            | Repair of cervix uteri NEC, dilation of cervix uteri, other specified other operations on cervix uteri, unspecified other operations on cervix uteri                                                                                                                                                                                                                                              | Other operations on cervix uteri      | Female                |
| Q07.1, Q07.2, Q07.3, Q07.4, Q07.5, Q07.6, Q07.8, Q07.9 | Abdominal hysterocolpectomy and excision of periuterine, abdominal hysterectomy and excision of periuterine tissue NEC, abdominal hysterocolpectomy NEC, total abdominal hysterectomy NEC, subtotal abdominal hysterectomy, excision of accessory uterus, other                                                                                                                                   | Hysterectomy                          | Female                |

|                                                               |                                                                                                                                                                                                                                                                                                                                                                                                                                                                                                     |                                        |        |
|---------------------------------------------------------------|-----------------------------------------------------------------------------------------------------------------------------------------------------------------------------------------------------------------------------------------------------------------------------------------------------------------------------------------------------------------------------------------------------------------------------------------------------------------------------------------------------|----------------------------------------|--------|
|                                                               | specified abdominal excision of uterus, unspecified abdominal excision of uterus                                                                                                                                                                                                                                                                                                                                                                                                                    |                                        |        |
| Q08.1, Q08.2, Q08.3, V08.8, Q08.9                             | Vaginal hysterectomy and excision of periuterine tissue NEC, vaginal hysterocolpectomy NEC, other specified vaginal excision of uterus, unspecified vaginal excision of uterus                                                                                                                                                                                                                                                                                                                      |                                        |        |
| Q09.1, Q09.2, Q09.3, Q09.3, Q09.4, Q09.5, Q09.6, Q09.8, Q09.9 | Open removal of products of conception from uterus, open myomectomy, open excision of lesion of uterus NEC, open biopsy of lesion of uterus, metroplasty, Incision of uterus NEC, other specified other open operations on uterus, unspecified other open operations on uterus                                                                                                                                                                                                                      | Other open operations on uterus        | Female |
| Q10.1, Q10.2, Q10.3, Q10.8, Q10.9                             | Dilation of cervix uteri and curettage of products of conception from uterus, curettage of products of conception from uterus NEC, dilation of cervix uteri and curettage of uterus NEC, other specified curettage of uterus, unspecified curettage of uterus                                                                                                                                                                                                                                       | Curettage of uterus                    | Female |
| Q11.1, Q11.2, Q11.3, Q11.4, Q11.5, Q11.6, Q1.8, Q11.9         | Vacuum aspiration of products of conception from uterus NEC, dilation of cervix uteri and evacuation of products of conception from uterus NEC, evacuation of products of conception from uterus NEC, extraction of menses, vacuum aspiration of products of conception from uterus using rigid cannula, vacuum aspiration of products of conception from uterus using flexible cannula, other specified other evacuation of contents of uterus, unspecified other evacuation of contents of uterus | Other evacuation of contents of uterus | Female |
| Q12.1, Q12.2, Q12.3, Q12.4, Q12.8, Q12.9                      | Introduction of intrauterine contraceptive device, replacement of intrauterine contraceptive device, removal of displaced intrauterine contraceptive device NEC, removal of intrauterine contraceptive device NEC, other specified intrauterine contraceptive device, unspecified intrauterine contraceptive device                                                                                                                                                                                 | Intrauterine contraceptive device      | Female |

|                                                        |                                                                                                                                                                                                                                                                                                                                                                                                                                                                                                                   |                                                     |        |
|--------------------------------------------------------|-------------------------------------------------------------------------------------------------------------------------------------------------------------------------------------------------------------------------------------------------------------------------------------------------------------------------------------------------------------------------------------------------------------------------------------------------------------------------------------------------------------------|-----------------------------------------------------|--------|
| Q13.x                                                  | Transfer of embryo to uterus NEC, intracervical artificial insemination, intrauterine artificial insemination, intrauterine insemination with superovulation using partner sperm, intrauterine insemination with superovulation using donor sperm, intrauterine insemination without superovulation using partner sperm, intrauterine insemination without superovulation using donor sperm, other specified introduction of gametes into uterine cavity, unspecified introduction of gametes into uterine cavity | Introduction of gamete into uterine cavity          | Female |
| Q14.1, Q14.2, Q14.3, Q14.4, Q14.5, Q14.6, Q14.8, Q14.9 | Intra-amniotic injection of prostaglandin, intra-amniotic injection of abortifacient NEC, extra-amniotic injection of prostaglandin, extra-amniotic injection of abortifacient NEC, insertion of prostaglandin pessary, insertion of abortifacient pessary NEC, other specified introduction of abortifacient into uterine cavity, unspecified introduction of abortifacient into uterine cavity                                                                                                                  | Introduction of abortifacient into uterine cavity   | Female |
| Q15.1, Q15.2, Q15.3, Q15.4, Q15.8, Q15.9               | Introduction of radioactive substance into uterine cavity, introduction of therapeutic substance into uterine cavity NEC, injection into uterine cavity NEC, removal of therapeutic substance from uterine cavity, other specified introduction of other substance into uterine cavity, unspecified introduction of other substance into uterine cavity                                                                                                                                                           | Introduction of other substance into uterine cavity | Female |
| Q16.1, Q16.2, Q16.3, Q16.4, Q16.5, Q16.6, Q16.8, Q16.9 | Vaginal excision of lesion of uterus, balloon ablation of endometrium, Microwave ablation of endometrium NEC, free circulating saline ablation of endometrium, radiofrequency ablation of endometrium, photodynamic ablation of endometrium, other specified other vaginal operations on uterus, unspecified other vaginal operations on uterus                                                                                                                                                                   | Other vaginal operations on uterus                  | Female |
| Q17.x                                                  | Endoscopic resection of lesion of uterus, endoscopic cauterisation of lesion of uterus, endoscopic cryotherapy to lesion of uterus, endoscopic destruction of lesion of uterus NEC, endoscopic metroplasty, endoscopic microwave ablation of endometrium, Endoscopic balloon ablation of endometrium, other specified therapeutic endoscopic                                                                                                                                                                      | Therapeutic endoscopic operations on uterus         | Female |

|                                                        |                                                                                                                                                                                                                                                                                                                                                                                       |                                                  |        |
|--------------------------------------------------------|---------------------------------------------------------------------------------------------------------------------------------------------------------------------------------------------------------------------------------------------------------------------------------------------------------------------------------------------------------------------------------------|--------------------------------------------------|--------|
|                                                        | operations on uterus, unspecified therapeutic endoscopic operations on uterus                                                                                                                                                                                                                                                                                                         |                                                  |        |
| Q18.1, Q18.8, Q18.9                                    | Diagnostic endoscopic examination of uterus and biopsy of lesion of uterus, other specified diagnostic endoscopic examination of uterus, unspecified diagnostic endoscopic examination of uterus                                                                                                                                                                                      | Diagnostic endoscopic examination of uterus      | Female |
| Q19.1, Q19.2, Q19.3                                    | Connection of uterus to vagina, other specified plastic operations on uterus, unspecified plastic operations on uterus                                                                                                                                                                                                                                                                | Plastic operations on uterus                     | Female |
| Q20.1, Q20.2, Q20.3, Q20.4, Q20.5, Q20.6 Q20.8, Q20.9  | Freeing of adhesions of uterus, biopsy of lesion of uterus NEC, manual manipulation of uterus, vaginofixation of uterus, exploration of uterus NEC, focused ultrasound to lesion of uterus, other specified other operations on uterus, unspecified other operations on uterus                                                                                                        | Other operations on uterus                       | Female |
| Q21.1, Q21.8, Q21.9                                    | Transmyometrial transfer of embryo to uterus, other specified other introduction of gametes into uterine cavity, unspecified other introduction of gametes into uterine cavity                                                                                                                                                                                                        | Other introduction of gamete into uterine cavity | Female |
| Q22.1, Q22.2, Q22.3, Q22.8, Q22.9                      | Bilateral salpingoophorectomy, Bilateral salpingectomy NEC, Bilateral oophorectomy NEC, other specified bilateral excision of adnexa of uterus, unspecified bilateral excision of adnexa of uterus                                                                                                                                                                                    | Bilateral excision of adnexa of uterus           | Female |
| Q23.1, Q23.2, Q23.3, Q23.4, Q23.5, Q23.6, Q23.8, Q23.9 | Unilateral salpingoophorectomy NEC, salpingoophorectomy of remaining solitary fallopian tube and ovary, unilateral salpingectomy NEC, salpingectomy of remaining solitary fallopian tube NEC, unilateral oophorectomy NEC, oophorectomy of remaining solitary ovary NEC, other specified unilateral excision of adnexa of uterus, unspecified unilateral excision of adnexa of uterus | Unilateral excision of adnexa of uterus          | Female |
| Q24.1, Q24.3                                           | Salpingoophorectomy NEC, oophorectomy NEC                                                                                                                                                                                                                                                                                                                                             | Other excision of adnexa of uterus               | Female |
| Q25.1, Q25.8, Q25.9                                    | Excision of lesion of fallopian tube, other specified partial excision of fallopian tube, unspecified partial excision of fallopian tube                                                                                                                                                                                                                                              | Partial excision of fallopian tube               | Female |
| Q26.1, Q26.2, Q26.3, Q26.8, Q26.9                      | Insertion of tubal prosthesis into fallopian tube, revision of tubal prosthesis in fallopian tube, removal of tubal prosthesis from fallopian tube, other specified placement of prosthesis in fallopian tube, unspecified placement of prosthesis in fallopian tube                                                                                                                  | Placement of prosthesis in fallopian tube        | Female |

|                                                          |                                                                                                                                                                                                                                                                                                                                                       |                                                            |        |
|----------------------------------------------------------|-------------------------------------------------------------------------------------------------------------------------------------------------------------------------------------------------------------------------------------------------------------------------------------------------------------------------------------------------------|------------------------------------------------------------|--------|
| Q27.1, Q27.2,<br>Q27.8, Q27.9                            | Open bilateral ligation of fallopian tubes, open bilateral clipping of fallopian tubes, other specified open bilateral occlusion of fallopian tubes, unspecified open bilateral occlusion of fallopian tubes                                                                                                                                          | Open bilateral occlusion of fallopian tubes                | Female |
| Q28.1, Q28.2,<br>Q28.3, Q28.4,<br>Q28.8, Q28.9           | Open ligation of remaining solitary fallopian tube, open ligation of fallopian tube NEC, open clipping of remaining solitary fallopian tube, open clipping of fallopian tube NEC, other specified other open occlusion of fallopian tube, unspecified other open occlusion of fallopian tube                                                          | Other open occlusion of fallopian tube                     | Female |
| Q29.1, Q29.2,<br>Q29.8, Q29.9                            | Reanastomosis of fallopian tube NEC, open removal of clip from fallopian tube NEC, other specified open reversal of female sterilization, unspecified open reversal of female sterilisation                                                                                                                                                           | Open reversal of female sterilisation                      | Female |
| Q30.1, Q30.2,<br>Q30.3, Q30.4,<br>Q30.5, Q30.8,<br>Q30.9 | Reconstruction of fallopian tube, replantation of fallopian tube, anastomosis of fallopian tube NEC, salpingostomy, suture of fallopian tube, other specified other repair of fallopian tube, unspecified other repair of fallopian tube                                                                                                              | Other incision of fallopian tube and repair fallopian tube | Female |
| Q31.1, Q31.2,<br>Q31.8, Q31.9                            | Removal of products of conception from fallopian tube, drainage of fallopian tube, other specified incision of fallopian tube, unspecified incision of fallopian tube                                                                                                                                                                                 | Incision of fallopian tube                                 | Female |
| Q32.1, Q32.2,<br>Q32.3, Q32.8,<br>Q32.9                  | Excision of fimbria, burying of fimbria in wall of uterus, excision of hydatid of Morgagni, other specified operations on fimbria, unspecified operations on fimbria                                                                                                                                                                                  | Operations on fimbria                                      | Female |
| Q34.1, Q34.2,<br>Q34.3, Q34.4,<br>Q34.8, Q34.9           | Open freeing of adhesions of fallopian tube, open biopsy of fallopian tube, open dilation of fallopian tube, exploration of fallopian tube, other specified other open operations on fallopian tube, unspecified other open operations on fallopian tube                                                                                              | Other open operations on fallopian tube                    | Female |
| Q35.1, Q35.2,<br>Q35.3, Q35.4,<br>Q35.8, Q35.9           | Endoscopic bilateral cauterisation of fallopian tubes, endoscopic bilateral clipping of fallopian tubes, endoscopic bilateral ringing of fallopian tubes, endoscopic bilateral placement of intrafallopian implants, other specified endoscopic bilateral occlusion of fallopian tubes, unspecified endoscopic bilateral occlusion of fallopian tubes | Endoscopic bilateral occlusion of fallopian tubes          | Female |



|                                          |                                                                                                                                                                                                                                                                                                                                     |                                                           |        |
|------------------------------------------|-------------------------------------------------------------------------------------------------------------------------------------------------------------------------------------------------------------------------------------------------------------------------------------------------------------------------------------|-----------------------------------------------------------|--------|
| Q36.1, Q36.2, Q36.8, Q36.9               | Endoscopic occlusion of remaining solitary fallopian tube, endoscopic placement of intrafallopian implant into remaining solitary fallopian tube, other specified other endoscopic occlusion of fallopian tube, unspecified other endoscopic occlusion of fallopian tube                                                            | Other endoscopic occlusion of fallopian tube              | Female |
| Q37.1, Q37.8, Q37.9                      | Endoscopic removal of clip from fallopian tube, other specified endoscopic reversal of female sterilization, unspecified endoscopic reversal of female sterilisation                                                                                                                                                                | Endoscopic reversal of female sterilisation               | Female |
| Q38.1, Q38.2, Q38.3, Q38.8, Q38.9        | Endoscopic freeing of adhesions of fallopian tube, endoscopic injection into fallopian tube, endoscopic intrafallopian transfer of gametes, other specified other therapeutic endoscopic operations on fallopian tube, unspecified other therapeutic endoscopic operations on fallopian tube                                        | Other therapeutic endoscopic operations on fallopian tube | Female |
| Q39.1, Q39.8, Q39.9                      | Diagnostic endoscopic examination of fallopian tube and biopsy of lesion of fallopian tube, Other specified diagnostic endoscopic examination of fallopian tube, Unspecified diagnostic endoscopic examination of fallopian tube                                                                                                    | Diagnostic endoscopic examination of fallopian tube       | Female |
| Q41.x                                    | Salpingography, hydrotubation of fallopian tube, Dye test of fallopian tube, insufflation of fallopian tube, operations to ensure patency of fallopian tube NEC, recanalisation of fallopian tube, aspiration of fallopian tube, other specified other operations on fallopian tube, unspecified other operations on fallopian tube | Other operations on fallopian tube                        | Female |
| Q43.1, Q43.2, Q43.3, Q43.8, Q43.9        | Excision of wedge of ovary, excision of lesion of ovary, marsupialisation of lesion of ovary, other specified partial excision of ovary, unspecified partial excision of ovary                                                                                                                                                      | Partial excision of ovary                                 | Female |
| Q44.1, Q44.8, Q44.9                      | Open cauterisation of lesion of ovary, other specified open destruction of lesion of ovary, unspecified open destruction of lesion of ovary                                                                                                                                                                                         | Open destruction of lesion of ovary                       | Female |
| Q45.1, Q45.2, Q45.3, Q45.4, Q45.8, Q45.9 | Replantation of ovary, fixation of ovary NEC, suture of ovary, suture of rupture of corpus luteum, other specified repair of ovary, unspecified repair of ovary                                                                                                                                                                     | Repair of ovary                                           | Female |
| Q47.1, Q47.2, Q47.3, Q47.4, Q47.8, Q47.9 | Transposition of ovary, open freeing of adhesions of ovary, open biopsy of lesion of ovary, open drainage of cyst                                                                                                                                                                                                                   | Other open operations on ovary                            | Female |

|                                          |                                                                                                                                                                                                                                                                                                                                                                           |                                            |        |
|------------------------------------------|---------------------------------------------------------------------------------------------------------------------------------------------------------------------------------------------------------------------------------------------------------------------------------------------------------------------------------------------------------------------------|--------------------------------------------|--------|
|                                          | of ovary, other specified other open operations on ovary, unspecified other open operations on ovary                                                                                                                                                                                                                                                                      |                                            |        |
| Q48.1, Q48.2, Q48.3, Q48.4, Q48.8, Q48.9 | Endoscopic transurethral ultrasound directed oocyte recovery, endoscopic transvesical oocyte recovery, laparoscopic oocyte recovery, transvaginal oocyte recovery, other specified oocyte recovery, unspecified oocyte recovery                                                                                                                                           | Oocyte recovery                            | Female |
| Q49.1, Q49.2, Q49.2, Q49.4, Q49.8, Q49.9 | Endoscopic extirpation of lesion of ovary NEC, endoscopic freeing of adhesions of ovary, endoscopic drainage of cyst of ovary, endoscopic drilling of ovary, other specified therapeutic endoscopic operations on ovary, unspecified therapeutic endoscopic operations on ovary                                                                                           | Therapeutic endoscopic operations on ovary | Female |
| Q50.1, Q50.8, Q50.9                      | Diagnostic endoscopic examination of ovary and biopsy of lesion of ovary, other specified diagnostic endoscopic examination of ovary, unspecified diagnostic endoscopic examination of ovary                                                                                                                                                                              | Diagnostic endoscopic examination of ovary | Female |
| Q51.1, Q51.8, Q51.9                      | Transvaginal ultrasound guided aspiration of ovarian cyst, other specified other operations on ovary, unspecified other operations on ovary                                                                                                                                                                                                                               | Other operations on ovary                  | Female |
| Q52.1, Q52.3, Q52.3, Q52.8, Q52.9        | Excision of lesion of broad ligament of uterus, destruction of lesion of broad ligament of uterus, shortening of broad ligament of uterus, other specified operations on broad ligament of uterus, unspecified operations on broad ligament of uterus                                                                                                                     | Operations on broad ligament of uterus     | Female |
| Q54.x                                    | Suspension of uterus NEC, Plication of round ligament of uterus, division of uteropelvic ligament, Suspension of uterus using mesh NEC, Sacrohysteropexy, infracoccygeal hysteropexy, total removal of prosthetic material from previous suspension of uterus, other specified operations on other ligament of uterus, unspecified operations on other ligament of uterus | Operations on other ligament of uterus     | Female |
| Q55.3, Q55.4                             | Papanicolau smear NEC colposcopy of cervix,                                                                                                                                                                                                                                                                                                                               | Other examination of female genital tract  |        |
| Q56.1, Q56.2, Q56.8, Q56.9               | fertility investigation of female NEC, Fertiltoscopy, other specified other operations on female genital tract, unspecified other operations on female genital tract                                                                                                                                                                                                      | Other operations on female genital tract   | Female |

|                                                        |                                                                                                                                                                                                                                                                                       |                                                  |        |
|--------------------------------------------------------|---------------------------------------------------------------------------------------------------------------------------------------------------------------------------------------------------------------------------------------------------------------------------------------|--------------------------------------------------|--------|
| Q57.8, Q57.9                                           | Other specified other operations on other ligament of uterus, unspecified other operations on other ligament of uterus                                                                                                                                                                | Other operations on other ligament of uterus     | Female |
| Q58.x                                                  | Delivery of Terminated Fetus                                                                                                                                                                                                                                                          | Delivery of terminated Fetus                     | Female |
| N01.1, N01.2, N01.3, N01.8, N01.9                      | Excision of scrotum, excision of lesion of scrotum, destruction of lesion of scrotum, other specified extirpation of scrotum, unspecified extirpation of scrotum                                                                                                                      | Extirpation of scrotum                           | Male   |
| N03.1, N03.2, N03.3, N03.4, N03.5, N03.6, N03.8, N03.9 | Biopsy of lesion of scrotum, drainage of scrotum, suture of scrotum, exploration of scrotum, removal of foreign body from scrotum, reconstruction of scrotum, other specified other operations on scrotum, unspecified other operations on scrotum                                    | Other operations on scrotum                      | Male   |
| N05.1, N05.2, N05.3, N05.8, N05.9                      | Bilateral subcapsular orchidectomy, bilateral orchidectomy NEC, bilateral inguinal orchidectomy, other specified bilateral excision of testes, unspecified bilateral excision of testes                                                                                               | Bilateral excision of testes                     | Male   |
| N06.1, N06.2, N06.3, N06.4, N06.5, N06.6, N06.8, N06.9 | Subcapsular orchidectomy NEC, excision of aberrant testis, orchidectomy NEC, excision of testicular appendage, division of cremaster, inguinal orchidectomy NEC, other specified other excision of testis, unspecified other excision of testis                                       | Other excision of testis                         | Male   |
| N07.1, N07.2, N07.8, N07.9                             | Excision of lesion of testis, destruction of lesion of testis, other specified extirpation of lesion of testis, unspecified extirpation of lesion of testis                                                                                                                           | Extirpation of lesion of testis                  | Male   |
| N08.1, N08.2, N08.3, N08.4,                            | Bilateral microvascular transfer of testes to scrotum, one stage bilateral orchidopexy NEC, first stage bilateral orchidopexy, second stage bilateral orchidopexy                                                                                                                     | Bilateral placement of testes in scrotum         | Male   |
| N09.2, N09.3, N09.4,                                   | One stage orchidopexy NEC, first stage orchidopexy NEC, second stage orchidopexy NEC                                                                                                                                                                                                  | Unspecified other placement of testis in scrotum | Male   |
| N15.x                                                  | Bilateral epididymectomy, unilateral epididymectomy, excision of lesion of epididymis, drainage of epididymis, biopsy of lesion of epididymis, aspiration of lesion of epididymis, epididymovasostomy, other specified operations on epididymis, unspecified operations on epididymis | Operations on epididymis                         | Male   |

|                                                        |                                                                                                                                                                                                                                                              |                                        |        |
|--------------------------------------------------------|--------------------------------------------------------------------------------------------------------------------------------------------------------------------------------------------------------------------------------------------------------------|----------------------------------------|--------|
| N17.1, N17.2, N17.8, N17.9                             | Bilateral vasectomy, ligation of vas deferens NEC, other specified excision of vas deferens, unspecified excision of vas deferens                                                                                                                            | Excision of vas deferens               | Male   |
| N18.1, N18.2, N18.8, N18.9                             | Reversal of bilateral vasectomy, suture of vas deferens NEC, other specified repair of spermatic cord, unspecified repair of spermatic cord                                                                                                                  | Repair of spermatic cord               | Male   |
| N19.1, N19.2, N19.8, N19.9                             | Ligation of varicocele, embolisation of varicocele, other specified operations on varicocele, unspecified operations on varicocele                                                                                                                           | Operations on varicocele               | Male   |
| N20.1, N20.2, N20.3, N20.4, N20.5, N20.8, N20.9        | Excision of lesion of spermatic cord, biopsy of spermatic cord drainage of spermatic cord, vasotomy, vasography, other specified other operations on spermatic cord, unspecified other operations on spermatic cord                                          | Other operations on spermatic cord     | Male   |
| N22.1, N22.2, N22.3, N22.4, N22.5, N22.8, N22.9        | Excision of seminal vesicle, Incision of seminal vesicle, seminal vesiculography, transrectal needle biopsy of seminal vesicle, resection of ejaculatory duct, other specified operations on seminal vesicle, unspecified operations on seminal vesicle      | Operations on seminal vesicle          | Male   |
| N26.1, N26.2, N26.8, N26.9                             | Total amputation of penis, partial amputation of penis, other specified amputation of penis, unspecified amputation of penis                                                                                                                                 | Amputation of penis                    | Male   |
| N30.1, N30.2, N30.3, N30.4, N30.5, N30.6, N30.8, N30.9 | Prepuceplasty, freeing of adhesions of prepuce, circumcision, dorsal slit of prepuce, stretching of prepuce, manual reduction of prepuce, other specified operations on prepuce, unspecified operations on prepuce                                           | Operations on prepuce                  | Male   |
| N34.1, N34.2, N34.3, N34.4, N34.5, N34.6               | Fertility investigation of male NEC, collection of sperm NEC, male colposcopy, microsurgical epididymal sperm aspiration, percutaneous epididymal sperm aspiration, testicular sperm extraction                                                              | Other operations on male genital tract | Male   |
| P03.1, P03.2, P03.3, P03.4, P03.5, P03.8, P03.9        | Excision of Bartholin gland, marsupialization of Bartholin gland, excision of lesion of Bartholin gland, drainage of Bartholin gland, operations on Bartholin duct, other specified operations on Bartholin gland, unspecified operations on Bartholin gland | Operations on Bartholin gland          | Female |
| Rxx.x                                                  | Pregnancy related Codes                                                                                                                                                                                                                                      | Childbirth                             | Female |
| X15.1                                                  | Combined operations for transformation from male to female                                                                                                                                                                                                   | Transwoman gender affirming procedure  | Male   |
| X15.2                                                  | Combined operations for transformation from female to male                                                                                                                                                                                                   | Transman gender affirming procedure    | Female |

|                               |                                                             |                            |        |
|-------------------------------|-------------------------------------------------------------|----------------------------|--------|
| Z43.4, Z43.5,<br>Z43.6        | Spermatic cord, Seminal vesicle,<br>Male perineum           | Male genital organ         | Male   |
| Z44.2, Z44.6                  | Bartholin gland, Pouch of Douglas                           | Vagina                     | Female |
| Z45                           | Uterus                                                      | Uterus                     | Female |
| Z46.1, Z46.2,<br>Z46.3, Z46.4 | Fimbria, Fallopian tube, Ovary,<br>Broad ligament of uterus | Other female genital tract | Female |

**eTable 9.** Characteristics of Transgender and Gender Diverse Individuals and Cisgender Individuals in the United Kingdom’s Clinical Practice Research Datalink 1988–2019 (Without Imputation)

|                                                         | <b>Transfeminine individuals<br/>n=1330</b> | <b>Transmasculine individuals<br/>n=892</b> | <b>TGD, unknown assigned sex at birth<br/>n=1095</b> | <b>Cisgender men<br/>n=68165</b> | <b>Cisgender women<br/>n=68004</b> |
|---------------------------------------------------------|---------------------------------------------|---------------------------------------------|------------------------------------------------------|----------------------------------|------------------------------------|
| <b>Age, mean (SD)</b>                                   | 37.8 (13.8)                                 | 27.4 (10.0)                                 | 33.9 (13.1)                                          | 33.6 (13.2)                      | 33.5 (13.2)                        |
| <b>Index year, median (IQR)</b>                         | 2009 (14)                                   | 2015 (9)                                    | 2010 (11)                                            | 2011 (13)                        | 2011 (13)                          |
| <b>Body mass index, n (%)</b>                           |                                             |                                             |                                                      |                                  |                                    |
| Underweight                                             | 68 (5.1)                                    | 26 (2.9)                                    | 48 (4.4)                                             | 1708 (2.5)                       | 2544 (3.7)                         |
| Normal                                                  | 530 (39.8)                                  | 309 (34.6)                                  | 385 (35.2)                                           | 20979 (30.8)                     | 26812 (39.4)                       |
| Overweight                                              | 336 (25.3)                                  | 199 (22.3)                                  | 234 (21.4)                                           | 18117 (26.6)                     | 15128 (22.2)                       |
| Obese                                                   | 261 (19.6)                                  | 231 (25.9)                                  | 220 (20.1)                                           | 10789 (15.8)                     | 13854 (20.4)                       |
| Missing                                                 | 135 (10.2)                                  | 127 (14.2)                                  | 208 (19.0)                                           | 16572 (24.3)                     | 9666 (14.2)                        |
| <b>Smoking Status, n (%)</b>                            |                                             |                                             |                                                      |                                  |                                    |
| Never                                                   | 426 (32.0)                                  | 311 (34.9)                                  | 347 (31.7)                                           | 24205 (35.5)                     | 27758 (40.8)                       |
| Former                                                  | 458 (34.4)                                  | 288 (32.3)                                  | 269 (24.6)                                           | 16685 (24.5)                     | 19172 (28.2)                       |
| Current                                                 | 369 (27.7)                                  | 249 (27.9)                                  | 411 (37.5)                                           | 21162 (31.0)                     | 17554 (25.8)                       |
| Missing                                                 | 77 (5.8)                                    | 44 (4.9)                                    | 68 (6.2)                                             | 6113 (9.0)                       | 3520 (5.2)                         |
| <b>Alcohol use, n (%)</b>                               |                                             |                                             |                                                      |                                  |                                    |
| Never                                                   | 76 (5.7)                                    | 79 (8.9)                                    | 91 (8.3)                                             | 3631 (5.3)                       | 5321 (7.8)                         |
| Former                                                  | 55 (4.1)                                    | 49 (5.5)                                    | 78 (7.1)                                             | 2157 (3.2)                       | 3023 (4.4)                         |
| Current                                                 | 1015 (76.3)                                 | 594 (66.6)                                  | 710 (64.8)                                           | 47056 (69.0)                     | 47475 (69.8)                       |
| Missing                                                 | 184 (13.8)                                  | 170 (19.1)                                  | 216 (19.7)                                           | 15321 (22.5)                     | 12185 (17.9)                       |
| <b>Race/ethnicity,<sup>a</sup> n (%)</b>                |                                             |                                             |                                                      |                                  |                                    |
| Asian                                                   | 16 (1.2)                                    | 10 (1.1)                                    | 13 (1.2)                                             | 2384 (3.5)                       | 3055 (4.5)                         |
| Black                                                   | 12 (0.9)                                    | 19 (2.1)                                    | 5 (0.5)                                              | 1754 (2.6)                       | 2343 (3.4)                         |
| White                                                   | 1010 (75.9)                                 | 683 (76.6)                                  | 770 (70.3)                                           | 41174 (60.4)                     | 45534 (67.0)                       |
| Other                                                   | 45 (3.4)                                    | 39 (4.4)                                    | 33 (3.0)                                             | 1944 (2.9)                       | 2435 (3.6)                         |
| Unknown or Another race                                 | 247 (18.6)                                  | 141 (15.8)                                  | 274 (25.0)                                           | 20909 (30.7)                     | 14637 (21.5)                       |
| <b>Index of Multiple Deprivation,<sup>b</sup> n (%)</b> |                                             |                                             |                                                      |                                  |                                    |
| 1 <sup>st</sup> Quintile                                | 172 (12.9)                                  | 105 (11.8)                                  | 132 (12.1)                                           | 8346 (12.2)                      | 8310 (12.2)                        |
| 2 <sup>nd</sup> Quintile                                | 226 (17.0)                                  | 135 (15.1)                                  | 169 (15.4)                                           | 10723 (15.7)                     | 10722 (15.8)                       |
| 3 <sup>rd</sup> Quintile                                | 247 (18.6)                                  | 146 (16.4)                                  | 222 (20.3)                                           | 12680 (18.6)                     | 12673 (18.6)                       |
| 4 <sup>th</sup> Quintile                                | 338 (25.4)                                  | 255 (28.6)                                  | 262 (23.9)                                           | 17605 (25.8)                     | 17578 (25.8)                       |
| 5 <sup>th</sup> Quintile                                | 347 (26.1)                                  | 251 (28.1)                                  | 310 (28.3)                                           | 18811 (27.6)                     | 18721 (27.5)                       |
| <b>Median person time, years</b>                        | 9.3                                         | 3.9                                         | 8.7                                                  | 7.5                              | 7.5                                |
| <b>Total person-time, years</b>                         | 13171.95                                    | 5961.20                                     | 10615.32                                             | 618732.62                        | 617014.87                          |

|                                                                                                     |           |          |           |            |            |
|-----------------------------------------------------------------------------------------------------|-----------|----------|-----------|------------|------------|
| <b>Died, n (%)</b>                                                                                  | 70 (5.3)  | 13 (1.5) | 53 (4.8)  | 1951 (2.9) | 1608 (2.4) |
| <b>Cause of death,<sup>c</sup> n (%)</b>                                                            |           |          |           |            |            |
| Certain infectious and parasitic diseases                                                           | ≤5 (-)    | 0 (0)    | 0 (0)     | 19 (1.0)   | 29 (1.9)   |
| Codes for special purposes                                                                          | ≤5 (-)    | 0 (0)    | 0 (0)     | 12 (0.7)   | ≤5 (-)     |
| Congenital malformations, deformations, and chromosomal abnormalities                               | 0 (0)     | 0 (0)    | 0 (0)     | 7 (0.4)    | ≤5 (-)     |
| Diseases of the blood and blood-forming organs and certain disorders involving the immune mechanism | 0 (0)     | 0 (0)    | 0 (0)     | 6 (0.3)    | 6 (0.4)    |
| Diseases of the circulatory system                                                                  | 16 (25.0) | ≤5 (-)   | 14 (26.4) | 506 (27.5) | 294 (19.3) |
| Diseases of the digestive system                                                                    | ≤5 (-)    | ≤5 (-)   | 7 (13.2)  | 152 (8.3)  | 111 (7.3)  |
| Diseases of the eye and adnexa                                                                      | 0 (0)     | 0 (0)    | 0 (0)     | 0 (0)      | ≤5 (-)     |
| Diseases of the genitourinary system                                                                | 0 (0)     | 0 (0)    | 0 (0)     | 18 (1.0)   | 17 (1.1)   |
| Diseases of the musculoskeletal system and connective tissue                                        | 0 (0)     | 0 (0)    | 0 (0)     | 7 (0.4)    | 17 (1.1)   |
| Diseases of the nervous system                                                                      | ≤5 (-)    | 0 (0)    | ≤5 (-)    | 84 (4.6)   | 86 (5.7)   |
| Diseases of the respiratory system                                                                  | 8 (12.5)  | ≤5 (-)   | ≤5 (-)    | 203 (11.0) | 156 (10.3) |
| Diseases of the skin and subcutaneous tissue                                                        | 0 (0)     | 0 (0)    | 0 (0)     | 6 (0.3)    | ≤5 (-)     |
| Endocrine, nutritional, and metabolic diseases                                                      | ≤5 (-)    | ≤5 (-)   | ≤5 (-)    | 35 (1.9)   | 19 (1.3)   |
| External causes of morbidity and mortality                                                          | 8 (12.5)  | ≤5 (-)   | 10 (18.9) | 169 (9.2)  | 98 (6.4)   |
| Mental and behavioral disorders                                                                     | ≤5 (-)    | ≤5 (-)   | 0 (0)     | 67 (3.6)   | 83 (5.5)   |
| Neoplasms                                                                                           | 13 (20.3) | ≤5 (-)   | 12 (22.6) | 530 (28.8) | 580 (38.2) |
| Pregnancy, childbirth, and the puerperium                                                           | 0 (0)     | 0 (0)    | 0 (0)     | 0 (0)      | ≤5 (-)     |
| Symptoms, signs and abnormal clinical and laboratory findings, not elsewhere classified             | ≤5 (-)    | ≤5 (-)   | ≤5 (-)    | 19 (1.0)   | 9 (0.6)    |

CPRD = Clinical Practice Research Datalink; n = number; SE = standard error; TGD = transgender and gender diverse.

Sex assigned at birth for transgender individuals where it was previously unknown was imputed using multiple imputation with chained equations. Body mass index, smoking status, and alcohol use were imputed for the entire cohort.

<sup>a</sup> Asian was defined as Bangladeshi, Chinese, Indian, Pakistani, or Other Asian; Black was defined as Black African, Black Caribbean, or Black Other; and Other defined as Mixed or Other.

<sup>b</sup> Practice Level Index of Multiple Deprivation

<sup>c</sup> CPRD requires suppression of counts ≤5. As such, no proportions are reported for these cells.

**eTable 10.** Overall and Cause-Specific Mortality Rate Ratios for Transgender and Gender Diverse Individuals Compared to Cisgender Individuals in the United Kingdom’s Clinical Practice Research Datalink (Without Imputation)

| Cause of death                                                                          | Transfeminine individuals         |                                     |                                       | Transmasculine individuals        |                                     |                                       | TGD individuals unknown sex assigned at birth |                                     |                                       |
|-----------------------------------------------------------------------------------------|-----------------------------------|-------------------------------------|---------------------------------------|-----------------------------------|-------------------------------------|---------------------------------------|-----------------------------------------------|-------------------------------------|---------------------------------------|
|                                                                                         | Number who died (No) <sup>a</sup> | MRR (95% CI)<br>Compared to cis men | MRR (95% CI)<br>Compared to cis women | Number who died (No) <sup>a</sup> | MRR (95% CI)<br>Compared to cis men | MRR (95% CI)<br>Compared to cis women | Number who died (No) <sup>a</sup>             | MRR (95% CI)<br>Compared to cis men | MRR (95% CI)<br>Compared to cis women |
| Overall                                                                                 | 70                                | 1.19 (0.94–1.51)                    | 1.54 (1.21–1.89)                      | 13                                | 1.11 (0.65–1.91)                    | 1.43 (0.82–2.49)                      | 53                                            | 1.71 (1.31–2.23)                    | 2.11 (1.61–2.78)                      |
| Certain infectious and parasitic diseases                                               | ≤5                                | 1.82 (0.41–8.01)                    | 1.02 (0.24–4.43)                      | 0                                 | -                                   | -                                     | 0                                             | -                                   | -                                     |
| Diseases of the circulatory system                                                      | 16                                | 0.85 (0.51–1.43)                    | 1.11 (0.64–1.93)                      | ≤5                                | 0.64 (0.16–2.59)                    | 1.14 (0.35–3.70)                      | 14                                            | 1.17 (0.72–1.89)                    | 1.57 (0.88–2.81)                      |
| Diseases of the digestive system                                                        | ≤5                                | 1.03 (0.43–2.46)                    | 0.97 (0.39–2.39)                      | ≤5                                | 1.08 (0.17–6.91)                    | 1.01 (0.16–6.28)                      | 7                                             | 1.68 (0.83–3.40)                    | 1.66 (0.80–3.44)                      |
| Diseases of the nervous system                                                          | ≤5                                | 0.73 (0.19–2.88)                    | 0.54 (0.15–1.98)                      | 0                                 | -                                   | -                                     | ≤5                                            | 1.04 (0.28–3.79)                    | 0.71 (0.19–2.69)                      |
| Diseases of the respiratory system                                                      | 8                                 | 1.06 (0.52–2.17)                    | 1.07 (0.53–2.16)                      | ≤5                                | 0.76 (0.13–4.47)                    | 1.09 (0.20–6.07)                      | 8                                             | 0.83 (0.32–2.13)                    | 0.77 (0.31–1.95)                      |
| Endocrine, nutritional and metabolic diseases                                           | ≤5                                | 0.69 (0.07–6.90)                    | 1.21 (0.16–9.31)                      | ≤5                                | 3.58 (0.85–15.14)                   | 3.41 (0.26–43.64)                     | ≤5                                            | 1.97 (0.62–6.25)                    | 3.47 (0.99–11.86)                     |
| External causes of mortality                                                            | 8                                 | 1.49 (0.70–3.15)                    | 1.52 (0.75–3.06)                      | ≤5                                | 1.30 (0.44–3.84)                    | 1.28 (0.43–3.76)                      | 10                                            | 1.82 (1.00–3.33)                    | 2.03 (1.11–3.70)                      |
| Mental and behavioral disorders                                                         | ≤5                                | 1.53 (0.47–5.00)                    | 1.17 (0.43–3.19)                      | ≤5                                | 2.28 (0.63–8.30)                    | 1.48 (0.26–8.43)                      | 0                                             | -                                   | -                                     |
| Neoplasms                                                                               | 13                                | 0.72 (0.42–1.24)                    | 0.48 (0.28–0.83)                      | ≤5                                | 0.99 (0.33–2.99)                    | 0.69 (0.23–2.17)                      | 12                                            | 1.11 (0.69–1.78)                    | 0.71 (0.43–1.17)                      |
| Symptoms, signs and abnormal clinical and laboratory findings, not elsewhere classified | ≤5                                | 7.57 (2.42–23.67)                   | 10.02 (2.97–39.64)                    | ≤5                                | 8.60 (0.88–83.80)                   | 14.02 (1.56–126.25)                   | ≤5                                            | 1.65 (0.20–13.94)                   | 2.74 (0.24–31.02)                     |

95% CI = 95% confidence interval; MRR = mortality rate ratio; No = number; TGD = transgender and gender diverse.  
 Models were estimated using Poisson regression adjusted for index age, index year, race/ethnicity (White, Black, and Asian or another or unknown race/ethnicity), index of multiple deprivation (quintiles), smoking status (current, former, never, or missing), alcohol use (current, former, never, or missing), body mass index (underweight or healthy weight, overweight, obese, or missing) and practice.  
<sup>a</sup> CPRD requires suppression of counts ≤5.



**eTable 11.** Overall and Cause-Specific Mortality Rate Ratios for Transgender and Gender Diverse Individuals Compared to Cisgender Individuals in the United Kingdom’s Clinical Practice Research Datalink (Only Patients Who Could Have Died During or After 1998)

| Cause of death                                                                           | Transfeminine individuals        |                                           |                                             | Transmasculine individuals       |                                           |                                             |
|------------------------------------------------------------------------------------------|----------------------------------|-------------------------------------------|---------------------------------------------|----------------------------------|-------------------------------------------|---------------------------------------------|
|                                                                                          | Number who died (n) <sup>a</sup> | MRR (95% CI)<br>Compared to cisgender men | MRR (95% CI)<br>Compared to cisgender women | Number who died (n) <sup>a</sup> | MRR (95% CI)<br>Compared to cisgender men | MRR (95% CI)<br>Compared to cisgender women |
| Overall                                                                                  | 101                              | 1.39 (1.13–1.70)                          | 1.67 (1.36–2.05)                            | 29                               | 1.30 (0.88–1.92)                          | 1.59 (1.07–2.36)                            |
| Certain infectious and parasitic diseases                                                | ≤5                               | 1.83 (0.42–8.00)                          | 0.92 (0.22–3.92)                            | 0                                | -                                         | -                                           |
| Diseases of the circulatory system                                                       | 25                               | 1.06 (0.71–1.58)                          | 1.53 (1.02–2.29)                            | ≤5                               | 0.72 (0.28–1.89)                          | 1.11 (0.41–2.96)                            |
| Diseases of the digestive system                                                         | 9                                | 1.34 (0.70–2.57)                          | 1.33 (0.68–2.56)                            | ≤5                               | 1.20 (0.27–5.45)                          | 1.20 (0.26–5.56)                            |
| Diseases of the nervous system                                                           | ≤5                               | 0.65 (0.18–2.27)                          | 0.48 (0.14–1.70)                            | ≤5                               | 1.17 (0.16–8.48)                          | 0.75 (0.10–5.49)                            |
| Diseases of the respiratory system                                                       | 9                                | 0.87 (0.45–1.68)                          | 0.87 (0.45–1.70)                            | ≤5                               | 1.28 (0.43–3.82)                          | 1.37 (0.46–4.09)                            |
| Endocrine, nutritional and metabolic diseases                                            | ≤5                               | 1.50 (0.40–5.68)                          | 2.54 (0.64–10.09)                           | ≤5                               | 2.36 (0.32–17.34)                         | 3.55 (0.50–24.96)                           |
| External causes of mortality                                                             | 13                               | 1.52 (0.88–2.62)                          | 1.77 (1.00–3.11)                            | ≤5                               | 1.26 (0.50–3.22)                          | 1.43 (0.55–3.73)                            |
| Mental and behavioral disorders                                                          | ≤5                               | 0.97 (0.34–2.73)                          | 0.89 (0.32–2.45)                            | ≤5                               | 1.05 (0.14–8.07)                          | 0.69 (0.09–5.11)                            |
| Neoplasms                                                                                | 20                               | 0.78 (0.50–1.21)                          | 0.51 (0.33–0.80)                            | 7                                | 1.13 (0.53–2.45)                          | 0.77 (0.35–1.67)                            |
| Symptoms, signs and abnormal clinical and laboratory findings, not elsewhere classified* | ≤5                               | 4.66 (1.65–13.16)                         | 4.02 (0.49–32.80)                           | ≤5                               | 8.93 (2.81–28.34)                         | 8.76 (1.05–69.21)                           |

95% CI = 95% confidence interval; MRR = mortality rate ratio; and n = number.

Models were estimated using Poisson regression adjusted for index age, index year, index of multiple deprivation (continuous), body mass index (underweight or healthy weight, overweight, or obese) and practice.

Missing sex assigned at birth was imputed using multiple imputation. Models were estimated using Poisson regression adjusted for index age, index year, race/ethnicity (White, Black, and Asian or another or unknown race/ethnicity), index of multiple deprivation (quintiles), smoking status (current, former, or never), alcohol use (current, former, or never), body mass index (underweight or healthy weight, overweight, or obese) and practice.

<sup>a</sup> CPRD requires suppression of counts ≤5.

**eTable 12.** Mortality Rate Ratios for Deaths Due to Select Causes of Death Among Transgender and Gender Diverse Individuals Compared to Cisgender Individuals in the United Kingdom’s Clinical Practice Research Datalink (Without Imputation)

| Cause of death                                                                                                                                                                                                                                                                                                                                                                                                                                                                                                           | All transgender and gender diverse individuals |                                           |                                             |
|--------------------------------------------------------------------------------------------------------------------------------------------------------------------------------------------------------------------------------------------------------------------------------------------------------------------------------------------------------------------------------------------------------------------------------------------------------------------------------------------------------------------------|------------------------------------------------|-------------------------------------------|---------------------------------------------|
|                                                                                                                                                                                                                                                                                                                                                                                                                                                                                                                          | Number who died (n) <sup>a</sup>               | MRR (95% CI)<br>Compared to cisgender men | MRR (95% CI)<br>Compared to cisgender women |
| <b>External causes of mortality</b>                                                                                                                                                                                                                                                                                                                                                                                                                                                                                      |                                                |                                           |                                             |
| Suicide/homicide                                                                                                                                                                                                                                                                                                                                                                                                                                                                                                         | 9                                              | 3.01 (1.45–6.22)                          | 5.65 (2.66–11.99)                           |
| Accidental poisoning                                                                                                                                                                                                                                                                                                                                                                                                                                                                                                     | 6                                              | 2.43 (1.12–5.28)                          | 5.29 (2.37–11.83)                           |
| <b>Neoplasms</b>                                                                                                                                                                                                                                                                                                                                                                                                                                                                                                         |                                                |                                           |                                             |
| Gastrointestinal                                                                                                                                                                                                                                                                                                                                                                                                                                                                                                         | 14                                             | 1.55 (0.81–2.95)                          | 2.25 (1.16–4.35)                            |
| Lung                                                                                                                                                                                                                                                                                                                                                                                                                                                                                                                     | 9                                              | 1.18 (0.60–2.35)                          | 1.22 (0.63–2.39)                            |
| <b>Endocrine, nutritional, and metabolic diseases</b>                                                                                                                                                                                                                                                                                                                                                                                                                                                                    | ≤5                                             | 2.19 (0.90–5.34)                          | 3.21 (1.22–8.41)                            |
| <b>Symptoms, signs and abnormal clinical and laboratory findings, not elsewhere classified</b>                                                                                                                                                                                                                                                                                                                                                                                                                           |                                                |                                           |                                             |
| Other ill-defined and unspecified causes of mortality                                                                                                                                                                                                                                                                                                                                                                                                                                                                    | ≤5                                             | 5.67 (2.04–15.79)                         | 19.54 (5.64–66.74)                          |
| 95% CI = 95% confidence interval; MRR = mortality rate ratio; and n = number.<br>Models were estimated using Poisson regression adjusted for index age, index year, race/ethnicity (White, Black, and Asian or another or unknown race/ethnicity), index of multiple deprivation (quintiles), smoking status (current, former, or never), alcohol use (current, former, never), body mass index (underweight or healthy weight, overweight, obese) and practice.<br><sup>a</sup> CPRD requires suppression of counts ≤5. |                                                |                                           |                                             |

**eTable 13.** Mortality Rate Ratios for Deaths Due to Select Causes Among Transgender and Gender Diverse Individuals Compared to Cisgender Individuals in the United Kingdom’s Clinical Practice Research Datalink (Only Patients Who Could Have Died During or After 1998)

| Cause of death                                                                                                                                                                                                                                                                                                                                                                                                                                                                                                                                                                                             | All transgender and gender diverse individuals |                                           |                                             |
|------------------------------------------------------------------------------------------------------------------------------------------------------------------------------------------------------------------------------------------------------------------------------------------------------------------------------------------------------------------------------------------------------------------------------------------------------------------------------------------------------------------------------------------------------------------------------------------------------------|------------------------------------------------|-------------------------------------------|---------------------------------------------|
|                                                                                                                                                                                                                                                                                                                                                                                                                                                                                                                                                                                                            | Number who died (n) <sup>a</sup>               | MRR (95% CI)<br>Compared to cisgender men | MRR (95% CI)<br>Compared to cisgender women |
| <b>External causes of mortality</b>                                                                                                                                                                                                                                                                                                                                                                                                                                                                                                                                                                        |                                                |                                           |                                             |
| Suicide/homicide                                                                                                                                                                                                                                                                                                                                                                                                                                                                                                                                                                                           | 9                                              | 3.06 (1.51–6.20)                          | 5.61 (2.65–11.86)                           |
| Accidental poisoning                                                                                                                                                                                                                                                                                                                                                                                                                                                                                                                                                                                       | 6                                              | 1.97 (0.85–4.57)                          | 4.48 (1.82–11.05)                           |
| <b>Neoplasms</b>                                                                                                                                                                                                                                                                                                                                                                                                                                                                                                                                                                                           |                                                |                                           |                                             |
| Gastrointestinal                                                                                                                                                                                                                                                                                                                                                                                                                                                                                                                                                                                           | 14                                             | 1.60 (0.92–2.76)                          | 2.27 (1.30–3.96)                            |
| Lung                                                                                                                                                                                                                                                                                                                                                                                                                                                                                                                                                                                                       | 9                                              | 1.26 (0.92–2.76)                          | 1.20 (0.61–2.37)                            |
| <b>Endocrine, nutritional, and metabolic diseases</b>                                                                                                                                                                                                                                                                                                                                                                                                                                                                                                                                                      | ≤5                                             | 1.80 (0.68–4.72)                          | 2.95 (1.08–8.06)                            |
| <b>Symptoms, signs and abnormal clinical and laboratory findings, not elsewhere classified</b>                                                                                                                                                                                                                                                                                                                                                                                                                                                                                                             |                                                |                                           |                                             |
| Other ill-defined and unspecified causes of mortality                                                                                                                                                                                                                                                                                                                                                                                                                                                                                                                                                      | ≤5                                             | 5.38 (2.00–14.50)                         | 19.63 (5.50–66.71)                          |
| 95% CI = 95% confidence interval; MRR = mortality rate ratio; and n = number.<br>Missing covariate data were imputed using multiple imputation. Models were estimated using Poisson regression adjusted for continuous index age, continuous index year, race/ethnicity (White, Black, and Asian or another or unknown race/ethnicity), index of multiple deprivation (quintiles), smoking status (current, former, never), alcohol use (current, former, never), body mass index (underweight or healthy weight, overweight, obese) and practice.<br><sup>a</sup> CPRD requires suppression of counts ≤5. |                                                |                                           |                                             |

**eFigure.** Flow Chart of Final Analysis Cohort Combining CPRD GOLD and CPRD Aurum

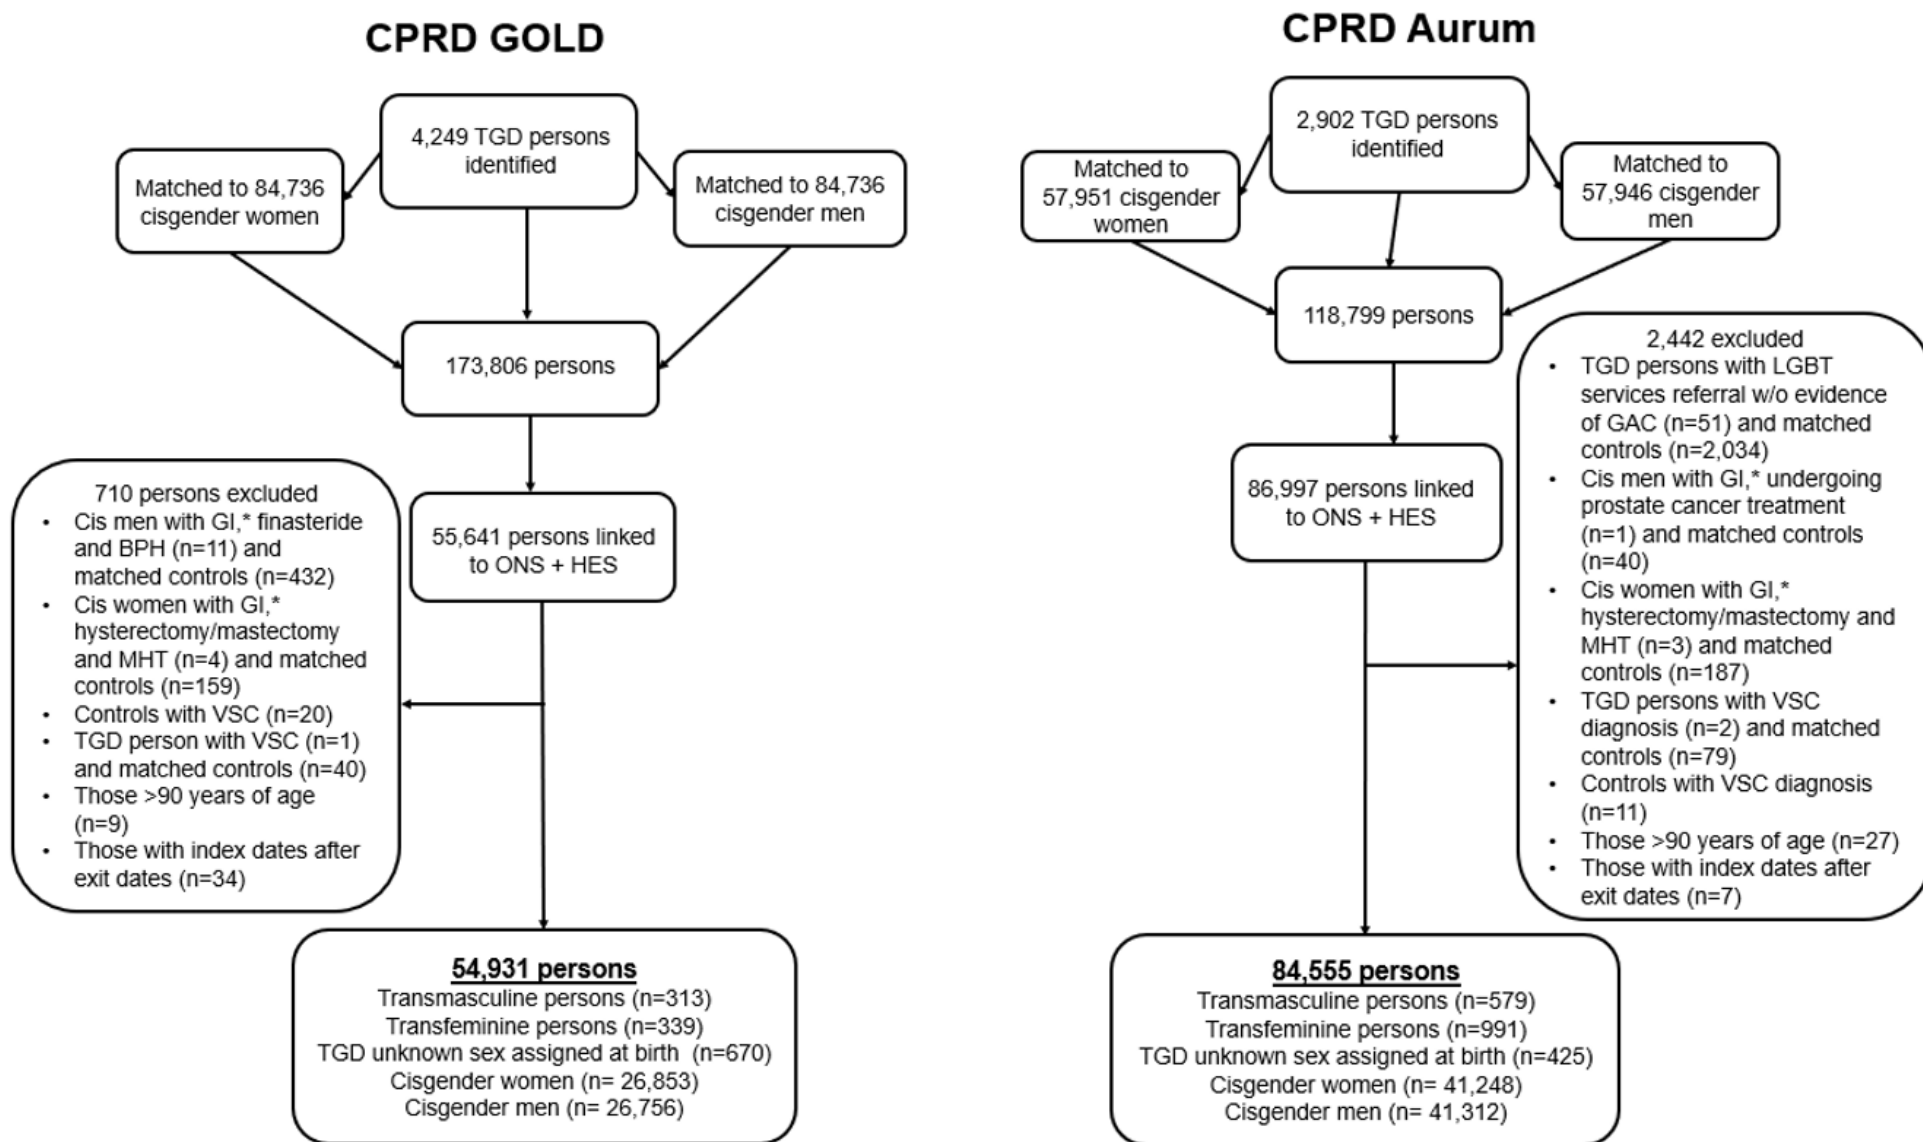

\*Individuals with gender incongruence codes in the medical record who were later identified to be cisgender people with sex-specific medical conditions that required sex steroid hormone therapy or surgery.

BPH = benign prostate hypertrophy; cis = cisgender; GAC = gender-affirming care; GI = gender incongruence; HES = Hospital and Episodes Statistics; LGBT = lesbian, gay, bisexual, and transgender; MHT = menopausal hormone therapy; ONS = Office of National Statistics; and VSC = variations of sex characteristics
